# Supplementary material for: Factors Associated with Quality of Life among People Living with HIV/AIDS in Mali, 2023
Source: Research Square preprint supplement (doi:10.21203/rs.3.rs-6262015/v1), 2025-05-15
Supplement: Supplementary file 1 [file ab43e3393a90417b2cbb8889.docx]

1. **Questionnaires**

Username :/ _____/

1. **Sociodemographic and economic characteristics**
2. Age (in years): /________/
3. Gender: /_____/ 1. Male 2. Female
4. Marital status: /_____/ 1. Married 2. Single 3. Divorced 4. Widowed
5. Religion: /_____/ 1. Muslim 2. Christian
6. Level of education: /_____/ 1. None 2. Primary 3. Secondary 4. Higher
7. Employment Status : /_____/ 1. Employed 2. Not Employed
8. Monthly income (in CFA francs): /____/ 1. ≤ 100,000 2. More than 100,000
9. ( in kg/ m2 ) : /_____/
10. **Clinical features**
11. Time since HIV diagnosis (years) : /_____/
12. Symptomatic : /_____/ 1. Yes 2. No
13. MI edema: Yes 🞏; No 🞏;
14. Presence of comorbidities : /_____/ 1. Yes 2. No

If yes, please specify.

1. Presence of opportunists : /_____/ 1. Yes 2. No
2. Tuberculosis: /_____/ 1. Yes 2. No
3. Oral and/or esophageal candidiasis: /_____/ 1. Yes 2. No
4. Non-TB bacterial pneumonias: /_____/ 1. Yes 2. No
5. Infection (Sepsis): /_____/ 1. Yes 2. No
6. Meningitis: /_____/ 1. Yes 2. No
7. Malaria: /_____/ 1. Yes 2. No
8. Cryptococcosis: /_____/ 1. Yes 2. No
9. Digestive coccidiosis: /_____/ 1. Yes 2. No
10. Cerebral toxoplasmosis: /_____/ 1. Yes 2. No
11. Pneumocystis pneumonia: /_____/ 1. Yes 2. No
12. Illicit drug use: /_____/ 1. Yes 2. No
13. Alcohol consumption: /_____/ 1. Yes 2. No
14. Stigmatization by society : /_____/ 1. Yes 2. No
15. **Immunological and virological characteristics**
16. Type of HIV : /_____/ 1. HIV1 2. HIV2 3. HIV1and 2.
17. Recent CD4 count (in cells/ mL ): /_____/
18. Recent viral load count (in copies/ml ): /_____/
19. Hemoglobin level in g/dl: /_____/
20. ASAT: /_____/
21. ALAT: /_____/
22. Creatinemia: /_____/
23. **Therapeutic data**
24. Duration of treatment (in months): /_____/
25. Cotrimoxazole chemoprophylaxis
26. ARTV: Yes 🞏No 🞏; If yes, date of initiation of TA antiretroviral treatment RV: …/…/….;
27. ARV line: TLD 🞏, TLE 🞏; Other lines: ……….
28. Concept of therapeutic break (even 1 day): /_____/ 1. Yes 2. No

break duration /____________/

1. Notion of adverse drug reactions: /_____/ 1. Yes 2. No
2. **Quality of Life Assessment Tool (WHOQOL-BREF) Available at** [**https://www.who.int/tools/whoqol/whoqol-bref**](https://www.who.int/tools/whoqol/whoqol-bref)

**Thinking about the last two weeks ( *check the one that best suits you* )**

1. **How do you find your quality of life? /____/**

1. Very bad 2. Bad 3. Neither good nor bad 4. Good 5. Very good

1. **How satisfied are you with your health? /____/**

1. Not at all satisfied 2. Satisfied 3. Neither satisfied nor dissatisfied 4. Dissatisfied 5. Very dissatisfied

1. **To what extent does (physical) pain prevent you from doing what you have to do? : /____/**

1. Not at all 2. A little 3. Moderately 4. A lot 5. Completely

1. **How much medical treatment do you need to cope with everyday life? /____/**

1. Not at all 2. A little 3. Moderately 4. A lot 5. Completely

1. **How pleasant do you find life?**

1. Not at all 2. A little 3. Moderately 4. A lot 5. Completely

1. **How meaningful is your life?**

1. Not at all 2. A little 3. Moderately 4. A lot 5. Completely

1. **How well are you able to concentrate?**

1. Not at all 2. A little 3. Moderately 4. A lot 5. Completely

1. **How safe do you feel in your daily life?**

1. Not at all 2. A little 3. Moderately 4. A lot 5. Completely

1. **How healthy is your environment (pollution, noise, sanitation, etc.)?**

1. Not at all 2. A little 3. Moderately 4. A lot 5. Completely

1. **Do you have enough energy in everyday life?**

1. Not at all 2. A little 3. Moderately 4. Sufficiently 5. Completely

1. **Do you accept your physical appearance?**

1. Not at all 2. A little 3. Moderately 4. Sufficiently 5. Completely

1. **Do you have enough money to meet your needs?**

1. Not at all 2. A little 3. Moderately 4. Sufficiently 5. Completely

1. **Do you feel you are informed enough to cope with everyday life?**

1. Not at all 2. A little 3. Moderately 4. Sufficiently 5. Completely

1. **To what extent do you have the opportunity to have leisure activities?**

1. Not at all 2. A little 3. Moderately 4. Sufficiently 5. Completely

1. **How do you find your ability to move around on your own?**

1. Very bad 2. Bad 3. Neither good nor bad 4. Good 5. Very good

1. **How satisfied are you with your sleep?**

1. Very dissatisfied 2. Dissatisfied 3. Neither satisfied nor dissatisfied 4. Satisfied 5. Very satisfied

1. **How satisfied are you with your ability to perform your daily activities?**

1. Very dissatisfied 2. Dissatisfied 3. Neither satisfied nor dissatisfied 4. Satisfied 5. Very satisfied

1. **How satisfied are you with your ability to work?**

1. Very dissatisfied 2. Dissatisfied 3. Neither satisfied nor dissatisfied 4. Satisfied 5. Very satisfied

1. **How good do you think of yourself?**

1. Very dissatisfied 2. Dissatisfied 3. Neither satisfied nor dissatisfied 4. Satisfied 5. Very satisfied

1. **How satisfied are you with your personal relationships?**

1. Very dissatisfied 2. Dissatisfied 3. Neither satisfied nor dissatisfied 4. Satisfied 5. Very satisfied

1. **How satisfied are you with your sex life?**

1. Very dissatisfied 2. Dissatisfied 3. Neither satisfied nor dissatisfied 4. Satisfied 5. Very satisfied

1. **How satisfied are you with the support you receive from your friends?**

1. Very dissatisfied 2. Dissatisfied 3. Neither satisfied nor dissatisfied 4. Satisfied 5. Very satisfied

1. **How satisfied are you with where you live?**

1. Very dissatisfied 2. Dissatisfied 3. Neither satisfied nor dissatisfied 4. Satisfied 5. Very satisfied

1. **How easily do you access the care you need?**

1. Very dissatisfied 2. Dissatisfied 3. Neither satisfied nor dissatisfied 4. Satisfied 5. Very satisfied

1. **How satisfied are you with your means of transportation?**

1. Very dissatisfied 2. Dissatisfied 3. Neither satisfied nor dissatisfied 4. Satisfied 5. Very satisfied

1. **Do you often experience negative feelings such as blues, hopelessness, anxiety, or depression?**

1. Never 2. Sometimes 3. Often 4. Very often 5. Always
